# Supplementary material for: Visuomotor control of leaping over a raised obstacle is sensitive to small baseline displacements
Source: PubMed Central journal article supplement (PMC8074954; doi:10.1098/rsos.201877), 2021-03-10
Supplement: rsos201877_review_history.pdf [file rsos201877_review_history.pdf]

## **Visuomotor control of leaping over a raised obstacle is sensitive to small baseline displacements**

Katherine A. J. Daniels and J. F. Burn

### **Article citation details**

*R. Soc. open sci.* **8**: 201877.

<http://dx.doi.org/10.1098/rsos.201877>

### **Review timeline**

Original submission: 20 October 2020

Revised submission: 4 February 2021

Final acceptance: 5 February 2021

Note: Reports are unedited and appear as submitted by the referee. The review history appears in chronological order.

## Review History

### RSOS-201877.R0 (Original submission)

#### Review form: Reviewer 1

**Is the manuscript scientifically sound in its present form?**

Yes

**Are the interpretations and conclusions justified by the results?**

Yes

**Is the language acceptable?**

Yes

**Do you have any ethical concerns with this paper?**

No

**Have you any concerns about statistical analyses in this paper?**

No

**Recommendation?**

Accept with minor revision (please list in comments)

**Comments to the Author(s)**

Thank you for the opportunity to review this interesting research study. The authors have presented a very well written manuscript that was a pleasure to review.

The primary aim of the study was to explore the influence of spatially remote objects on obstacle clearance during running. This is an interesting experimental paradigm and provides information that will be relevant to many fields. In general, I believe this paper is very well prepared, thoroughly considered and appropriate for publication.

I only have minor questions and these are listed below;

1. Please provide more detail, or a source reference for your approach to determine stance phase
2. Statistics - Please specify the approach to account for multiple comparisons in the analysis

**Review form: Reviewer 2**

**Is the manuscript scientifically sound in its present form?**

Yes

**Are the interpretations and conclusions justified by the results?**

Yes

**Is the language acceptable?**

Yes

**Do you have any ethical concerns with this paper?**

No

**Have you any concerns about statistical analyses in this paper?**

No

**Recommendation?**

Accept with minor revision (please list in comments)

**Comments to the Author(s)**

Overall this is a well written, concise article describing an experiment where the presence and location of a baseline under a jump is manipulated to study the effects on an individual's kinematics. I have few changes to request.

Abstract: Inclusion of some numerical results here would be helpful for the reader.

Introduction: Is the stated objective rather an aim?

Methods: This is unusual in its high number of female participants, do you think there may be any sex-related differences present?

The difference in height is quite small - can you comment on how results may potentially change with a greater change in height?

In your supplementary material, the conditions are listed as C1-4, some additional explanation in the SM to reiterate how these relate to the condition names in this section would be helpful.

Results: in this section, some parts are more discussion (e.g. P7 line 47 on). It would be helpful to include some key numerical results in this section, currently these are presented in the text as solely F and p values. Although referring to the figures, it would be clearer for the reader for some key numbers to be in this section.

Discussion: P8 line 54 on: It would be clearer to restate how the results support or refute the stated hypotheses/address the study aim/objectives here in the first instance, it is a little unclear what the headline findings are from this initial paragraph.

## Decision letter (RSOS-201877.R0)

The editorial office reopened on 4 January 2021. We are working hard to catch up after the festive break. If you need advice or an extension to a deadline, please do not hesitate to let us know -- we will continue to be as flexible as possible to accommodate the changing COVID situation. We wish you a happy New Year, and hope 2021 proves to be a better year for everyone.

Dear Dr Daniels

On behalf of the Editors, we are pleased to inform you that your Manuscript RSOS-201877 "Visuomotor control of leaping over a raised obstacle is sensitive to small baseline displacements" has been accepted for publication in Royal Society Open Science subject to minor revision in accordance with the referees' reports. Please find the referees' comments along with any feedback from the Editors below my signature.

We invite you to respond to the comments and revise your manuscript. Below the referees' and Editors' comments (where applicable) we provide additional requirements. Final acceptance of your manuscript is dependent on these requirements being met. We provide guidance below to help you prepare your revision.

Please submit your revised manuscript and required files (see below) no later than 7 days from today's (ie 27-Jan-2021) date. Note: the ScholarOne system will 'lock' if submission of the revision is attempted 7 or more days after the deadline. If you do not think you will be able to meet this deadline please contact the editorial office immediately.

Please note article processing charges apply to papers accepted for publication in Royal Society Open Science (<https://royalsocietypublishing.org/rsos/charges>). Charges will also apply to papers transferred to the journal from other Royal Society Publishing journals, as well as papers submitted as part of our collaboration with the Royal Society of Chemistry (<https://royalsocietypublishing.org/rsos/chemistry>). Fee waivers are available but must be requested when you submit your revision (<https://royalsocietypublishing.org/rsos/waivers>).

Thank you for submitting your manuscript to Royal Society Open Science and we look forward to receiving your revision. If you have any questions at all, please do not hesitate to get in touch.

Best regards,

Lianne Parkhouse  
Editorial Coordinator  
Royal Society Open Science  
[openscience@royalsociety.org](mailto:openscience@royalsociety.org)

on behalf of the Associate Editor, and Professor Kevin Padian (Subject Editor)  
openscience@royalsociety.org

Editor Comments to Author:

Thank you for your submission. As you see, the reviewers are largely happy with your manuscript and have offered a few minor things to address. We're pleased to accept it pending your revisions. Best wishes.

Reviewer comments to Author:

Reviewer: 1

Comments to the Author(s)

Thank you for the opportunity to review this interesting research study. The authors have presented a very well written manuscript that was a pleasure to review.

The primary aim of the study was to explore the influence of spatially remote objects on obstacle clearance during running. This is an interesting experimental paradigm and provides information that will be relevant to many fields. In general, I believe this paper is very well prepared, thoroughly considered and appropriate for publication.

I only have minor questions and these are listed below;

1. Please provide more detail, or a source reference for your approach to determine stance phase
2. Statistics - Please specify the approach to account for multiple comparisons in the analysis

Reviewer: 2

Comments to the Author(s)

Overall this is a well written, concise article describing an experiment where the presence and location of a baseline under a jump is manipulated to study the effects on an individual's kinematics. I have few changes to request.

Abstract: Inclusion of some numerical results here would be helpful for the reader.

Introduction: Is the stated objective rather an aim?

Methods: This is unusual in its high number of female participants, do you think there may be any sex-related differences present?

The difference in height is quite small - can you comment on how results may potentially change with a greater change in height?

In your supplementary material, the conditions are listed as C1-4, some additional explanation in the SM to reiterate how these relate to the condition names in this section would be helpful.

Results: in this section, some parts are more discussion (e.g. P7 line 47 on). It would be helpful to include some key numerical results in this section, currently these are presented in the text as solely F and p values. Although referring to the figures, it would be clearer for the reader for some key numbers to be in this section.

Discussion: P8 line 54 on: It would be clearer to restate how the results support or refute the stated hypotheses/address the study aim/objectives here in the first instance, it is a little unclear what the headline findings are from this initial paragraph.

### ===PREPARING YOUR MANUSCRIPT===

Your revised paper should include the changes requested by the referees and Editors of your manuscript. You should provide two versions of this manuscript and both versions must be provided in an editable format:

one version identifying all the changes that have been made (for instance, in coloured highlight, in bold text, or tracked changes);

a 'clean' version of the new manuscript that incorporates the changes made, but does not highlight them. This version will be used for typesetting.

Please ensure that any equations included in the paper are editable text and not embedded images.

Please ensure that you include an acknowledgements' section before your reference list/bibliography. This should acknowledge anyone who assisted with your work, but does not qualify as an author per the guidelines at <https://royalsociety.org/journals/ethics-policies/openness/>.

While not essential, it will speed up the preparation of your manuscript proof if you format your references/bibliography in Vancouver style (please see <https://royalsociety.org/journals/authors/author-guidelines/#formatting>). You should include DOIs for as many of the references as possible.

If you have been asked to revise the written English in your submission as a condition of publication, you must do so, and you are expected to provide evidence that you have received language editing support. The journal would prefer that you use a professional language editing service and provide a certificate of editing, but a signed letter from a colleague who is a native speaker of English is acceptable. Note the journal has arranged a number of discounts for authors using professional language editing services (<https://royalsociety.org/journals/authors/benefits/language-editing/>).

### ===PREPARING YOUR REVISION IN SCHOLARONE===

To revise your manuscript, log into <https://mc.manuscriptcentral.com/rsos> and enter your Author Centre - this may be accessed by clicking on "Author" in the dark toolbar at the top of the page (just below the journal name). You will find your manuscript listed under "Manuscripts with Decisions". Under "Actions", click on "Create a Revision".

Attach your point-by-point response to referees and Editors at Step 1 'View and respond to decision letter'. This document should be uploaded in an editable file type (.doc or .docx are preferred). This is essential.

Please ensure that you include a summary of your paper at Step 2 'Type, Title, & Abstract'. This should be no more than 100 words to explain to a non-scientific audience the key findings of your research. This will be included in a weekly highlights email circulated by the Royal Society press office to national UK, international, and scientific news outlets to promote your work.

At Step 3 'File upload' you should include the following files:

-- Your revised manuscript in editable file format (.doc, .docx, or .tex preferred). You should upload two versions:

- 1) One version identifying all the changes that have been made (for instance, in coloured highlight, in bold text, or tracked changes);
- 2) A 'clean' version of the new manuscript that incorporates the changes made, but does not highlight them.

- An individual file of each figure (EPS or print-quality PDF preferred [either format should be produced directly from original creation package], or original software format).
  - An editable file of each table (.doc, .docx, .xls, .xlsx, or .csv).
  - An editable file of all figure and table captions.
- Note: you may upload the figure, table, and caption files in a single Zip folder.
- Any electronic supplementary material (ESM).
  - If you are requesting a discretionary waiver for the article processing charge, the waiver form must be included at this step.
  - If you are providing image files for potential cover images, please upload these at this step, and inform the editorial office you have done so. You must hold the copyright to any image provided.
  - A copy of your point-by-point response to referees and Editors. This will expedite the preparation of your proof.

At Step 6 'Details & comments', you should review and respond to the queries on the electronic submission form. In particular, we would ask that you do the following:

- Ensure that your data access statement meets the requirements at <https://royalsociety.org/journals/authors/author-guidelines/#data>. You should ensure that you cite the dataset in your reference list. If you have deposited data etc in the Dryad repository, please only include the 'For publication' link at this stage. You should remove the 'For review' link.
- If you are requesting an article processing charge waiver, you must select the relevant waiver option (if requesting a discretionary waiver, the form should have been uploaded at Step 3 'File upload' above).
- If you have uploaded ESM files, please ensure you follow the guidance at <https://royalsociety.org/journals/authors/author-guidelines/#supplementary-material> to include a suitable title and informative caption. An example of appropriate titling and captioning may be found at [https://figshare.com/articles/Table\\_S2\\_from\\_Is\\_there\\_a\\_trade-off\\_between\\_peak\\_performance\\_and\\_performance\\_breadth\\_across\\_temperatures\\_for\\_aerobic\\_scope\\_in\\_teleost\\_fishes\\_/3843624](https://figshare.com/articles/Table_S2_from_Is_there_a_trade-off_between_peak_performance_and_performance_breadth_across_temperatures_for_aerobic_scope_in_teleost_fishes_/3843624).

At Step 7 'Review & submit', you must view the PDF proof of the manuscript before you will be able to submit the revision. Note: if any parts of the electronic submission form have not been completed, these will be noted by red message boxes.

## Author's Response to Decision Letter for (RSOS-201877.R0)

See Appendix A.

## Decision letter (RSOS-201877.R1)

We hope you are keeping well at this difficult and unusual time. We continue to value your support of the journal in these challenging circumstances. If Royal Society Open Science can assist you at all, please don't hesitate to let us know at the email address below.

Dear Dr Daniels,

It is a pleasure to accept your manuscript entitled "Visuomotor control of leaping over a raised obstacle is sensitive to small baseline displacements" in its current form for publication in Royal Society Open Science.

You can expect to receive a proof of your article in the near future. Please contact the editorial office ([openscience@royalsociety.org](mailto:openscience@royalsociety.org)) and the production office ([openscience\\_proofs@royalsociety.org](mailto:openscience_proofs@royalsociety.org)) to let us know if you are likely to be away from e-mail contact – if you are going to be away, please nominate a co-author (if available) to manage the proofing process, and ensure they are copied into your email to the journal.

Due to rapid publication and an extremely tight schedule, if comments are not received, your paper may experience a delay in publication. Royal Society Open Science operates under a continuous publication model. Your article will be published straight into the next open issue and this will be the final version of the paper. As such, it can be cited immediately by other researchers. As the issue version of your paper will be the only version to be published I would advise you to check your proofs thoroughly as changes cannot be made once the paper is published.

Please see the Royal Society Publishing guidance on how you may share your accepted author manuscript at <https://royalsociety.org/journals/ethics-policies/media-embargo/>. After publication, some additional ways to effectively promote your article can also be found here <https://royalsociety.org/blog/2020/07/promoting-your-latest-paper-and-tracking-your-results/>.

Thank you for your fine contribution. On behalf of the Editors of Royal Society Open Science, we look forward to your continued contributions to the Journal.

Best regards,  
Lianne Parkhouse  
Editorial Coordinator  
Royal Society Open Science  
[openscience@royalsociety.org](mailto:openscience@royalsociety.org)

on behalf of the Associate Editor and Professor Kevin Padian (Subject Editor)  
[openscience@royalsociety.org](mailto:openscience@royalsociety.org)

Follow Royal Society Publishing on Twitter: @RSocPublishing  
Follow Royal Society Publishing on Facebook:  
<https://www.facebook.com/RoyalSocietyPublishing.FanPage/>  
Read Royal Society Publishing's blog:  
<https://royalsociety.org/blog/blogsearchpage/?category=Publishing>

# Appendix A

## Response to reviewers

We thank both reviewers for their positive comments and valuable feedback on our study. We have responded to each of their points individually in green below and include a reference list at the end of this document. Red text has been used in the marked-up version of the revised manuscript to highlight alterations to the original text.

### Reviewer 1

Thank you for the opportunity to review this interesting research study. The authors have presented a very well written manuscript that was a pleasure to review.

The primary aim of the study was to explore the influence of spatially remote objects on obstacle clearance during running. This is an interesting experimental paradigm and provides information that will be relevant to many fields. In general, I believe this paper is very well prepared, thoroughly considered and appropriate for publication.

1. Please provide more detail, or a source reference for your approach to determine stance phase. The start of stance phase was defined as the first frame in which the horizontal velocity of the toe marker decreased below 0.006 m/s and the vertical height of the toe marker was below 0.05 m; the end of stance phase as the last frame before the horizontal velocity of the toe marker next increased above 0.006 m/s and the vertical height of the toe marker next increased above 0.05 m. This information is now included in the second paragraph of the 'Calculation of kinematic parameters' Methods subsection:

*Stance phases were identified automatically using an algorithm incorporating vertical height and horizontal velocity of a marker placed on the fifth metatarsal head of the relevant foot (horizontal velocity of marker <0.006 m/s and vertical height <0.05 m).*

These thresholds were selected by adjusting their values until the identified touchdown and toe-off frames of both normal running gait and the obstacle traversal steps were within 3 frames ( $\pm 0.025$  s) of the visually identified first and last frames in which the foot was in contact with the ground. As spatial rather than temporal variables were extracted from stance phase (with the exception of traversal speed), our study's results are not sensitive to the precise timing of touchdown and toe-off identification.

2. Statistics - Please specify the approach to account for multiple comparisons in the analysis. The family-wise error rate is controlled for within the *post hoc* pairwise comparisons that were conducted where we identified an ANOVA main effect ('Statistical analysis' subsection, paragraph 2), but we did not control for the fact that we performed multiple ANOVAs (11 in total) as these analyses were planned and complementary. We now specify this explicitly in the manuscript text – the relevant section now reads:

*Greenhouse-Geisser's adjustment to the degrees of freedom was used when Mauchley's test of sphericity was significant, and Tukey's HSD post hoc tests were used to identify pairwise differences*



*between groups when main effects were found. Bartlett's test for equality of variances was used to test for equal variance of the dependent variable between condition Bx and B0 for each obstacle height. Significance was accepted at  $\alpha = .05$  and the symbols \*, \*\* and \*\*\* were used in figures to represent  $p < .05$ ,  $p < .01$  and  $p < .001$  respectively. No family-wise error rate correction was performed for ANOVA main effects because these analyses were planned and complementary.*

We note that the decision not to control for multiple ANOVAs did not affect the conclusions of the study: even employing the Bonferroni correction for multiple comparisons, which is excessively conservative for complementary tests, only one main effect of obstacle condition (take-off distance) would no longer be identified as significant at a family-wise alpha level of 0.05.

## **Reviewer 2**

Overall this is a well written, concise article describing an experiment where the presence and location of a baseline under a jump is manipulated to study the effects on an individual's kinematics. I have few changes to request.

Abstract: Inclusion of some numerical results here would be helpful for the reader.

*As the abstract cannot be extended beyond 200 words, we are not able to add additional material here without removing text that we feel is essential for the reader to understand the study, particularly as there is no single numerical finding that fully encapsulates our conclusions. Instead, we now include appropriate numerical results in the Results section of the manuscript, as per the reviewer's later suggestion, and detail these additions below in response to their second-last comment.*

Introduction: Is the stated objective rather an aim?

We have changed the relevant word from 'objective' to 'aim'. The sentence now reads:

*The aim of this study was to investigate whether a simple geometric manipulation, spatially remote from the geometric feature signalling height and not affecting the perception of risk, would still elicit a change in limb kinematics during a running leap manoeuvre.*

Methods: This is unusual in its high number of female participants, do you think there may be any sex-related differences present?

We are not aware of any evidence to suggest that sex differences are present in visuomotor control of locomotion over obstacles. The primary sex-related factor that would be relevant to our study is that of leg length, and we control for this in the experimental design by scaling all obstacle heights and spatial parameters to the participant's greater trochanter height. It is possible that group differences in athletic capacity might influence traversal kinematics when leaping over higher obstacles, but those traversed within this study were comfortably within the capabilities of all participants of both sexes.

The difference in height is quite small - can you comment on how results may potentially change with a greater change in height?

We interpret this comment to be in reference to the height of the raised bar traversed by the participants.

The primary purpose of presenting two bar height conditions was not to investigate the effect of obstacle height on the measured parameters but simply to minimise the likelihood of the participants learning the height of the obstacle with repeated trials. There is a considerable existing literature on the effect of obstacle height on traversal kinematics, and the effects we observed on foot-obstacle distances, foot apex heights and foot clearances have been previously noted in earlier studies of obstacle traversal from walking gait (1–4). Whilst we might expect to see greater divergence in these parameters between conditions if we increased the height difference, we have no reason to believe that the observed effects of baseline position would be altered. It is conceivable that the physical proximity of the raised bar to the baseline might modulate the strength of the baseline offset effect, or that reduced safety margins at the upper height limit of participant leap capacity might modify control strategies, but this is speculation. We note the potential influence of obstacle size on our results in the fourth paragraph of the Discussion section - the relevant sentence now reads:

*It is possible that the risk of accidental obstacle contact was perceived to be greater in our protocol due to the faster gait and larger obstacles, or that the greater distance between the raised bar and base bar influenced the effect of the baseline offset, but it is unclear how these factors would differentially affect control mechanisms in the manner observed.*

In your supplementary material, the conditions are listed as C1-4, some additional explanation in the SM to reiterate how these relate to the condition names in this section would be helpful.

We now include a 'ReadMe' tab in the Supplementary Data spreadsheet which describes the coding of the obstacle height and condition factors with reference to the terminology used in the main manuscript.

Results: in this section, some parts are more discussion (e.g. P7 line 47 on).

We have edited this sentence and moved it to the Discussion. The new sentence (Discussion section, paragraph 4) reads:

*The most common foot orientations we observed at the instant of crossing (heel lowest point of lead foot; toe lowest point of trail foot) are consistent with the behaviour observed when stepping over raised obstacles in walk (8,41).*

It would be helpful to include some key numerical results in this section, currently these are presented in the text as solely F and p values. Although referring to the figures, it would be clearer for the reader for some key numbers to be in this section.

We report primarily F and p values in the manuscript text because there were two factors with main effects included in the ANOVA models, so eight individual means and standard deviations would need to be reported for each test and we consider these to be better presented within figures. We now include numerical results for clearance marker overall percentages, mean effect of obstacle height on take-off distance, approach step speed (including dimensional equivalent) and traversal step speed.

Discussion: P8 line 54 on: It would be clearer to restate how the results support or refute the stated hypotheses/address the study aim/objectives here in the first instance, it is a little unclear what the headline findings are from this initial paragraph.

We have revised and restructured the initial paragraph so it now leads with the 'headline' result that addresses the main study aim. The paragraph now reads:

*Although placing the baseline directly beneath the obstacle had no effect on any of the measured characteristics of limb trajectory, displacing the baseline altered both horizontal and vertical measures of limb trajectory indicating that information about baseline position was used for control. These alterations occurred despite the fact that the limb trajectories used when no baseline was present (Bx) could also have been used to traverse the obstacle successfully in all conditions with the baseline present: Not only were take-off and landing distances for all Bx trials at least double the displaced baseline distance from the obstacle, but in absolute terms they would have provided a safety margin much greater than used by running humans targeting foot placement positions at comparable speeds (3). Given that an altered trajectory was not required to avoid physical contact with the baseline nor maintain an adequate safety margin it is difficult to account for the observed changes as serving a useful purpose. Apex heights either remained the same or increased, making it unlikely that the changes minimised the metabolic work done performing the manoeuvre.*

## References

1. Austin GP, Garrett GE, Bohannon RW. Kinematic analysis of obstacle clearance during locomotion. *Gait Posture* [Internet]. 1999 Oct;10(2):109–20. Available from: <http://www.ncbi.nlm.nih.gov/pubmed/10502644>
2. Sparrow WA, Shinkfield AJ, Chow S, Begg RK. Characteristics of gait in stepping over obstacles. *Hum Mov Sci* [Internet]. 1996 Aug;15(4):605–22. Available from: <http://linkinghub.elsevier.com/retrieve/pii/016794579600022X>
3. Patla AE, Rietdyk S. Visual control of limb trajectory over obstacles during locomotion: effect of obstacle height and width. *Gait Posture*. 1993;1(1):45–60.
4. Patla AE. Understanding the roles of vision in the control of human locomotion. *Gait Posture* [Internet]. 1997 Feb;5(1):54–69. Available from: <http://linkinghub.elsevier.com/retrieve/pii/S0966636296011095>
